# Supplementary material for: Evaluation of GO/MnO2 composites as supercapacitors in neutral electrolytes: role of graphite oxide oxidation level
Source: Royal Society of Chemistry journal article supplement (doi:10.1039/c2jm34294d), 2012-01-01
Supplement: c2jm34294d.pdf [file c2jm34294d.pdf]

## **SUPPLEMENTARY INFORMATION**

### **Evaluation of GO/MnO<sub>2</sub> composites as supercapacitors in neutral electrolytes: Role of graphite oxide oxidation level**

**Mykola Seredych, and Teresa J. Bandosz\***

*Department of Chemistry, The CUNY Energy Institute, The City College of New York, 160 Convent*

*Ave, New York, NY, 10031, USA. E-mail: [tbandosz@ccny.cuny.edu](mailto:tbandosz@ccny.cuny.edu); Fax:*

*+1 212 650 6107; Tel: +1 212 650 6017*

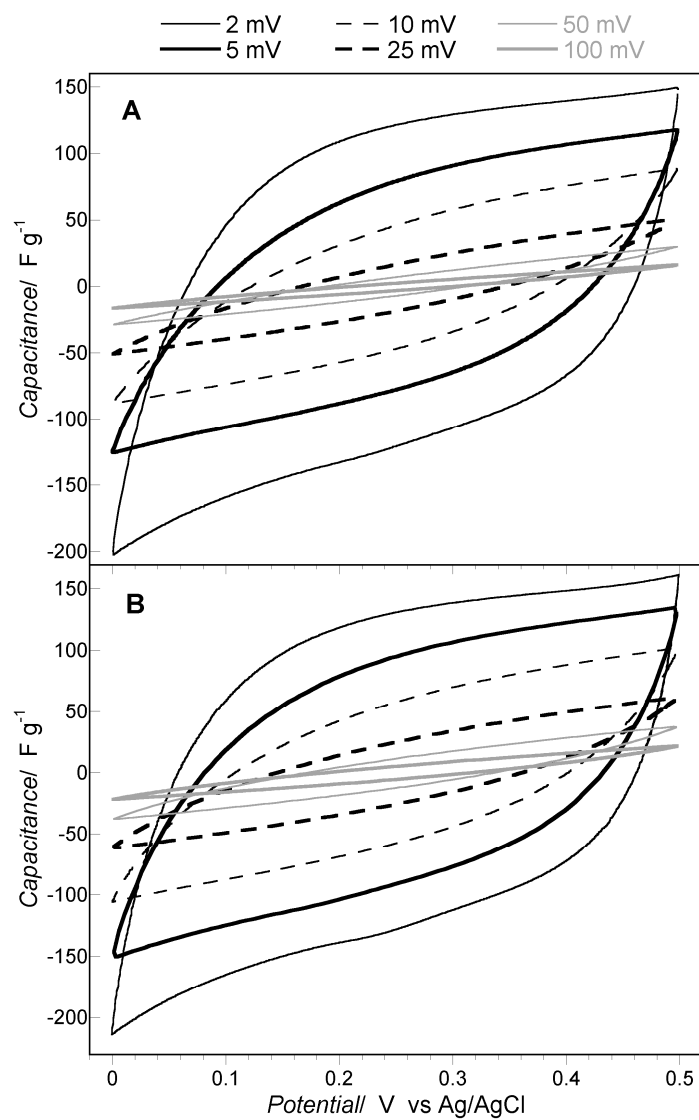

**Fig. 1S.** Cyclic voltammetry at different scan rate in three-electrode cell for MnGO-I in 0.5 M Na<sub>2</sub>SO<sub>4</sub> (A) and 0.5 M Li<sub>2</sub>SO<sub>4</sub> (B).

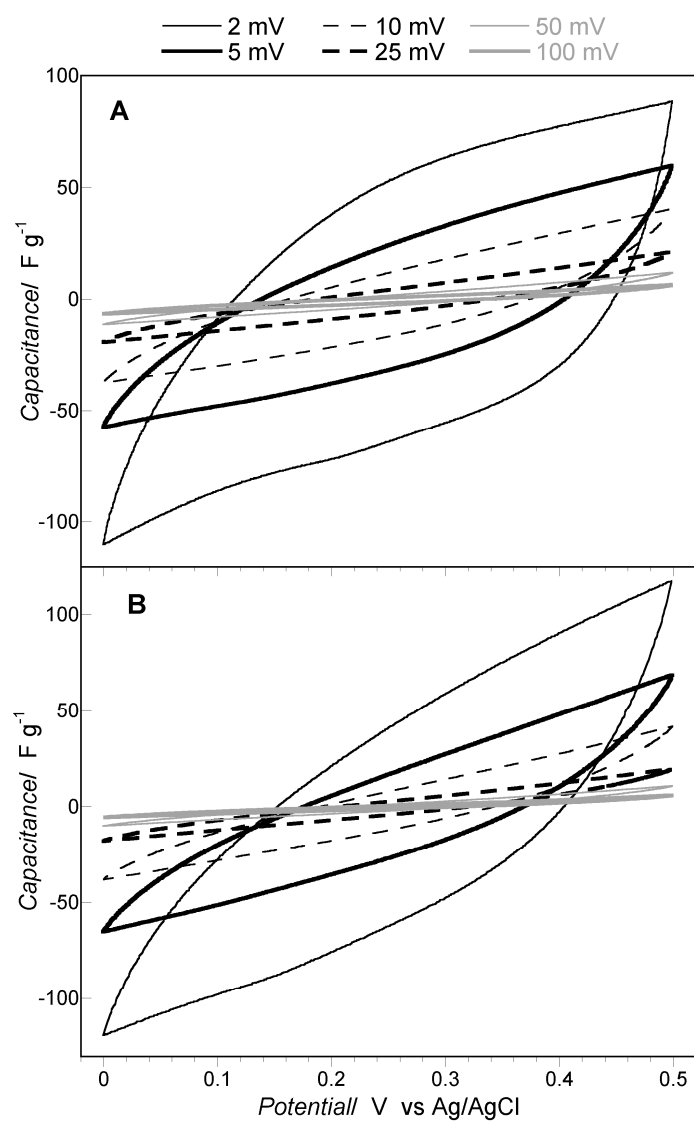

**Fig. 2S.** Cyclic voltammetry at different scan rate in three-electrode cell for MnGO-II in 0.5 M Na<sub>2</sub>SO<sub>4</sub> (A) and 0.5 M Li<sub>2</sub>SO<sub>4</sub> (B).

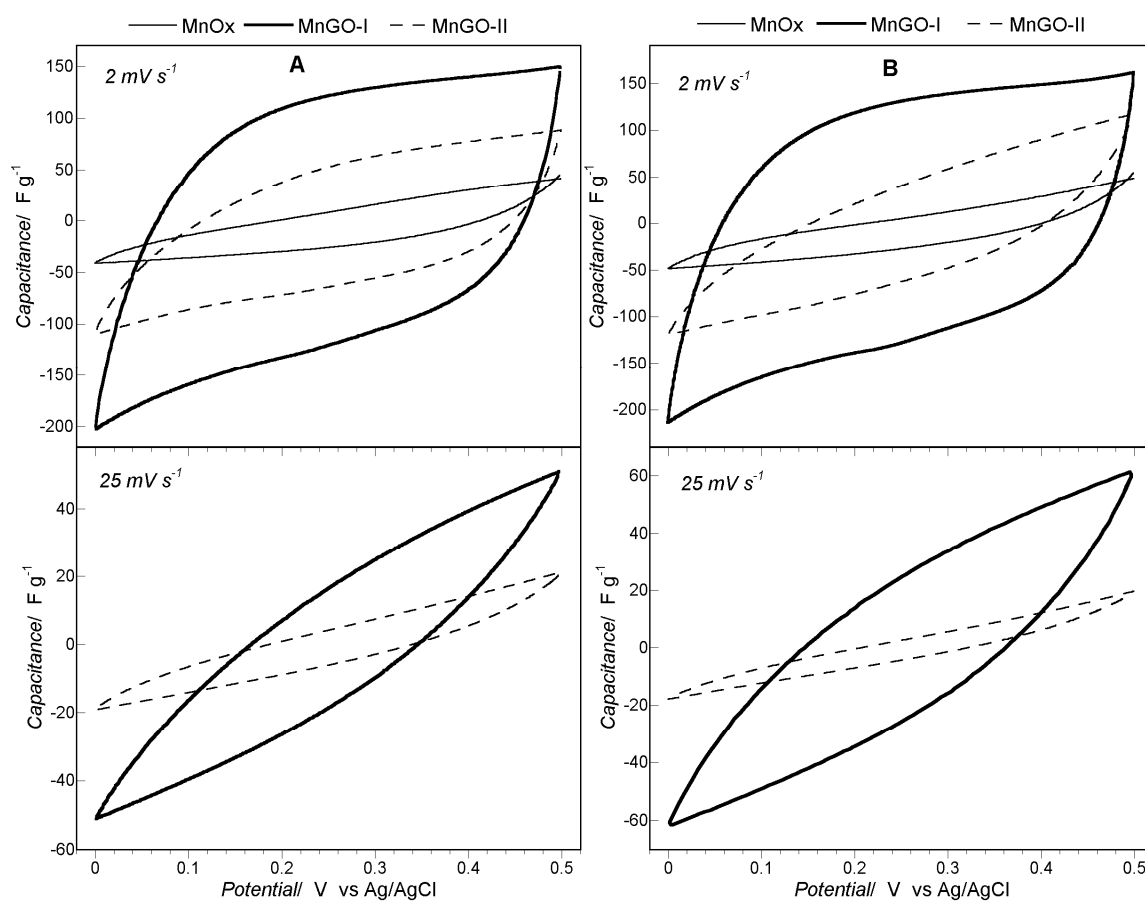

**Fig. 3S.** Comparison cyclic voltammetry in three-electrode cell for the materials studied in  $0.5 \text{ M Na}_2\text{SO}_4$  (A) and  $0.5 \text{ M Li}_2\text{SO}_4$  (B).
